REVIEW ARTICLE

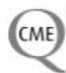

## Superficial or deep cervical plexus block for carotid endarterectomy: a systematic review of complications<sup>†</sup>

J. J. Pandit<sup>1</sup>\*, R. Satya-Krishna<sup>2</sup> and P. Gration<sup>1</sup>

<sup>1</sup>Nuffield Department of Anaesthetics, John Radcliffe Hospital, Oxford OX3 9DU, UK. <sup>2</sup>Department of Anesthesiology, University of Michigan Medical Center, Ann Arbor, MI, USA

\*Corresponding author. E-mail: jaideep.pandit@physiol.ox.ac.uk

Carotid endarterectomy is commonly conducted under regional (deep, superficial, intermediate, or combined) cervical plexus block, but it is not known if complication rates differ. We conducted a systematic review of published papers to assess the complication rate associated with superficial (or intermediate) and deep (or combined deep plus superficial/intermediate). The null hypothesis was that complication rates were equal. Complications of interest were: (1) serious complications related to the placement of block, (2) incidence of conversion to general anaesthesia, and (3) serious systemic complications of the surgical-anaesthetic process. We retrieved 69 papers describing a total of 7558 deep/combined blocks and 2533 superficial/intermediate blocks. Deep/combined block was associated with a higher serious complication rate related to the injecting needle when compared with the superficial/intermediate block (odds ratio 2.13,  $P=0.006$ ). The conversion rate to general anaesthesia was also higher with deep/combined block (odds ratio 5.15,  $P<0.0001$ ), but there was an equivalent incidence of other systemic serious complications (odds ratio 1.13,  $P=0.273$ ; NS). We conclude that superficial/intermediate block is safer than any method that employs a deep injection. The higher rate of conversion to general anaesthesia with the deep/combined block may have been influenced by the higher incidence of direct complications, but may also suggest that the superficial/combined block provides better analgesia during surgery.

*Br J Anaesth* 2007; **99**: 159–69

**Keywords:** anaesthetic techniques, regional, cervical plexus; anaesthetics, local; complications, regional anaesthesia; safety, techniques; surgery, vascular, carotid

Carotid endarterectomy surgery is commonly performed under cervical plexus block.<sup>79–81</sup> This is presumed to offer advantages over general anaesthesia in terms of monitoring neurological function during cross-clamping of the carotid artery since, in conscious patients, speech, cerebra- tion, and motor power provide early measures of inadequate cerebral perfusion.<sup>2–7</sup> Some studies also claim lower shunting requirements, lower cardiovascular morbidity, and shorter hospital stay.<sup>9–67</sup>

Traditionally, the common methods of cervical plexus block are termed ‘deep’ or ‘superficial’. The deep block, as described by Moore<sup>74</sup> or Winnie and colleagues,<sup>111</sup> consists of identifying the transverse processes of upper cervical vertebrae C2–C4 and injecting local anaesthetic directly into the deep (prevertebral) cervical space. This may be achieved either as three separate injections or as a single injection. The superficial block incorporates a variety of procedures. The simplest is a s.c. infiltration of

local anaesthetic along the posterior border of sternocleidomastoid muscle by either the surgeon or the anaesthetist.<sup>92</sup> An ‘intermediate’ block is one where the injecting needle pierces the investing fascia of the neck, deep to the s.c. layer, but superficial to the deep cervical (prevertebral) fascia (Fig. 1).<sup>78–80</sup> It is also possible to use a ‘combined block’, consisting of a deep injection and a superficial or intermediate injection.<sup>79</sup>

Practitioners may prefer one block to another, but no consensus exists on the efficacy of one block when compared with another. However, it has been suggested that complications of the technique are related to the deep injection and not the superficial (or intermediate) injection.<sup>81</sup> These complications include intrathecal or

<sup>†</sup>Presented in part at the International Anesthesia Research Society 77th Congress, March 21–25, 2003, New Orleans, LA, USA.

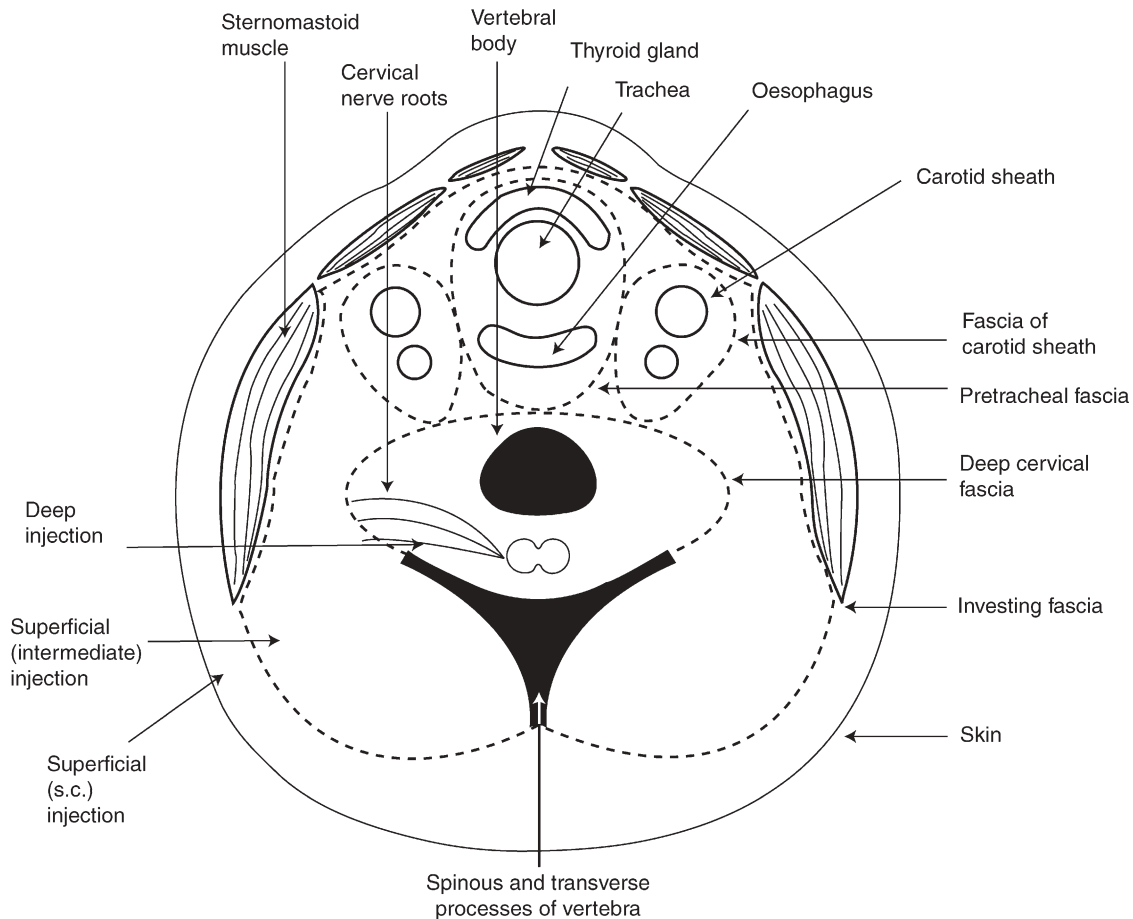

**Fig 1** Drawing of a cross-section of the neck at the C4 vertebral level, showing the sites of injection of the deep, intermediate, and superficial blocks (adapted from Pandit and colleagues<sup>80</sup>).

intravascular injection, respiratory problems related to phrenic nerve paralysis, or local anaesthetic toxicity. Nonetheless, after recently describing two complications using the deep cervical plexus block, Carling and Simmonds<sup>18</sup> stated explicitly that ‘the safest cervical block has not yet been established’, so the issue is one which indeed warrants more definitive evidence.

The aim of this review was to compare the incidence of complications associated with the use of a deep injection, whether as a sole technique or as part of a combined block, with the use of superficial or intermediate injections alone. We wished to investigate this question using quantitative methods to retrieve and analyse the relevant published literature. The null hypothesis of our analysis was that the incidence of complications was the same with both techniques.

## Methods

We adhered to the Meta-analysis of Observational Studies in Epidemiology (MOOSE) guidelines in the conduct of this review.<sup>105</sup> We searched the electronic databases PubMed, Medline, and EMBASE from 1966 to 2005

using the phrases ‘carotid’, ‘endarterectomy’, ‘cervical’, ‘plexus’, ‘local’, ‘regional’, ‘anaesthesia’, and combinations of these phrases. We then manually searched the reference lists of any relevant published article we retrieved. We also checked the Cochrane Controlled Trials register and the Bodleian Library’s database of doctoral theses for any relevant studies.

Articles were accepted if they fulfilled the following criteria: (1) a cervical plexus block was used in at least one group of patients reported in the study; (2) the type of block used was identifiable (i.e. deep, combined, superficial, or intermediate); (3) the surgery performed was carotid endarterectomy; (4) the article stated explicitly that it sought to document complications of the procedure, or described such complications, or stated categorically that there were no complications; (5) for any complications referred to, the article explicitly described which complications occurred and with which type of block; and (6) the article stated the number of patients studied (denominator) and the number of patients with complications (a numerator). For most case reports, this last criterion was less relevant since usually, only one case was reported; that is, the denominator and numerator were the same. Articles

were rejected if they did not meet the inclusion criteria above and also if: (1) they presented duplicate data published elsewhere and (2) they were published only as abstracts.

Articles were assessed using these criteria independently by the three authors. Any disagreements over acceptance/rejection were then discussed by all three authors.

We used the following terminology to describe the blocks used. A 'deep' cervical plexus block included any technique that employed a deep injection (e.g. a deep block alone or a combined block). A 'superficial' block was any technique that relied on either superficial or intermediate injection alone.

Retrieved papers were classified into five types of study:

- (1) randomized trials comparing deep vs superficial block;
- (2) randomized trials comparing general anaesthesia and deep or superficial block;
- (3) non-randomized trials comparing general anaesthesia and deep or superficial block;
- (4) case series reporting the use of deep or superficial block;
- (5) case reports or letters describing specific complications associated with the use of deep or superficial block.

Within each of these types of study, we noted the total number of patients in each of the retrieved papers (the denominator); and we noted the following numerators as the three categories of complications.

- (a) The number of patients suffering 'block-related serious complications'. These were defined as complications which were a threat to life arising from block placement and we included: intravascular or intrathecal injection of local anaesthetic, established (or suspected) local anaesthetic toxicity (in the absence of known or suspected intravascular injection), local trauma, or haematoma caused by the injecting needle leading to cancellation of surgery, airway obstruction, or respiratory distress after placement of block but before surgery (e.g. due to established or suspected diaphragmatic or vocal cord paralysis).
- (b) The number of patients requiring 'conversion to general anaesthesia' after placement of the block for any reason. These reasons included: any block-related serious complication as defined earlier; failure of adequate analgesia (i.e. block failure); lack of patient co-operation after insertion of the block; or extreme patient anxiety. We were aware that in some centres, any central nervous system (CNS) symptoms during cross-clamping or insertion of a shunt are indications for conversion to general anaesthesia; therefore, this was also noted.
- (c) The number of 'serious systemic complications'. These included: death due to any or an unspecified cause (excluding any related to direct placement of the block) during surgery or in the immediate post-operative period; cardiovascular complications (e.g.

myocardial infarction, angina); CNS complications [cerebrovascular accident/stroke, transient ischaemic attack (TIA), unconsciousness due to any or unspecified cause, other than due to direct complication of the block]; airway or respiratory complications during or after surgery (i.e. excluding those related to placement of the block itself); and significant wound haematoma during or after surgery. We did not define a strict time interval or limit for the 'postoperative phase', since this varied between articles. Therefore, we planned to accept any complication described by the authors as 'perioperative'.

In this scheme, the 'block-related serious complication' rate was our primary end-point, and an index of the safety of the block. The rate of 'conversion to general anaesthesia' was a crude measure of the efficacy of the block. The rate of 'serious systemic complications' was a crude measure of the overall risk of the surgical-anaesthetic process. We did not expect this last measure to differ between superficial and deep block, but could not anticipate the outcome of comparison of the other two measures. With respect to randomized or non-randomized trials comparing general anaesthesia and deep or superficial block, we used only the data from the cervical plexus block groups, and excluded consideration of the data from the general anaesthesia groups.

As deep block has probably been in use for longer than superficial, we wished to examine any 'publication bias' and exclude the possibility that complications associated with deep block occurred in earlier papers. We plotted the number of papers published examining deep and superficial block by year of publication, to assess if certain epochs yielded papers for only one type of block.

For each category of complication, we summed the numerator figures and the denominator figures from each of the studies to obtain a complication rate (expressed as a proportion). Then, for categories (1) to (4), we combined these complication rates to obtain total rates separately for deep and superficial block. We assessed the significance of the difference in these complication rates between deep and superficial block using the  $\chi^2$  test (Fisher's exact test where the numerator was zero).<sup>5</sup> We also calculated the odds ratio and relative risk of deep vs superficial block<sup>6</sup> (for this purpose, the 'rule of three' was used to estimate the implication of zero numerators).<sup>33</sup> We took  $P < 0.05$  to represent statistical significance. We did not subject the complications from case reports [category (5)] to statistical analysis, but assessed these data separately and subjectively.

## Results

Our initial search retrieved 92 potentially relevant papers from 1974 to 2006. However, we excluded nine because they did not meet the inclusion criteria. Five papers lacked

a clear statement or record of complications of the technique.<sup>23 40 69 91 93</sup> Two papers did not adequately describe the block used.<sup>84 110</sup> Two papers,<sup>82 87</sup> in our judgement, contained duplication of data published elsewhere<sup>7 47</sup>—for these papers, we included in our analysis the versions of the data<sup>7 47</sup> that seemed to us the more complete.

This left 83 papers for analysis: two randomized trials of deep and superficial block [category (1)]; three randomized trials of superficial (one paper) or deep block (two papers) and general anaesthesia [category (2)]; 25 non-randomized trials of superficial (three papers) or deep block (22 papers) and general anaesthesia [category (3)];

39 case series of superficial (11 papers) or deep block (28 papers) [category (4)]; and 14 case reports.

There were only two randomized controlled studies directly comparing deep with superficial block (Table 1). There were no serious complications as a direct result of the block. However, deep block yielded one conversion to general anaesthesia (patient anxiety) and there was a single systemic complication (cerebrovascular accident) in each of the two studies.

For randomized comparisons of block with general anaesthesia (Table 1), there were no serious complications as a direct result of either block. However, deep block

**Table 1** Results for randomized controlled studies. From each paper, only the regional block limb of the study has been used. The numerator represents the number of complications in each category; the denominator represents the total number of patients in the study. The last row represents the sum of the rows above

| Reference                                                                                                                   | Serious complications as a result of block |       | Conversion to general anaesthesia |       | Total serious complications |        |
|-----------------------------------------------------------------------------------------------------------------------------|--------------------------------------------|-------|-----------------------------------|-------|-----------------------------|--------|
|                                                                                                                             | Superficial                                | Deep  | Superficial                       | Deep  | Superficial                 | Deep   |
| <i>Comparing deep and superficial block</i>                                                                                 |                                            |       |                                   |       |                             |        |
| Pandit and colleagues <sup>79</sup>                                                                                         | 0/20                                       | 0/20  | 0/20                              | 0/20  | 0/20                        | 1/20   |
| Stoneham and colleagues <sup>102</sup>                                                                                      | 0/20                                       | 0/20  | 0/20                              | 1/20  | 0/20                        | 1/20   |
| Total                                                                                                                       | 0/40                                       | 0/40  | 0/40                              | 1/40  | 0/40                        | 2/40   |
| <i>Comparing general anaesthesia and superficial block (one study) and general anaesthesia and deep block (two studies)</i> |                                            |       |                                   |       |                             |        |
| Prough and colleagues <sup>85</sup>                                                                                         | 0/13                                       |       | 0/13                              |       | 0/13                        |        |
| Forssell and colleagues <sup>38</sup>                                                                                       |                                            | 0/56  |                                   | 2/56  |                             | 9/56   |
| Sbarigia and colleagues <sup>88</sup>                                                                                       |                                            | 0/50  |                                   | 0/50  |                             | 8/50   |
| Total                                                                                                                       | 0/13                                       | 0/106 | 0/13                              | 2/106 | 0/13                        | 17/106 |

**Table 2** Results for non-randomized controlled studies comparing general anaesthesia and superficial block (three studies) and general anaesthesia and deep block (22 studies). From each paper, only the regional block limb of the study has been used. The numerator represents the number of complications in each category; the denominator represents the total number of patients in the study. The last row represents the sum of the rows above

| Reference                                | Serious complications as a result of block |        | Conversion to general anaesthesia |         | Total serious complications |          |
|------------------------------------------|--------------------------------------------|--------|-----------------------------------|---------|-----------------------------|----------|
|                                          | Superficial                                | Deep   | Superficial                       | Deep    | Superficial                 | Deep     |
| Gabelman and colleagues <sup>39</sup>    | 0/54                                       |        | 0/54                              |         | 13/54                       |          |
| McCarthy and colleagues <sup>67</sup>    | 0/100                                      |        | 0/100                             |         | 7/100                       |          |
| Stoughton and colleagues <sup>104</sup>  | 0/150                                      |        | 9/150                             |         | 2/150                       |          |
| Agrioglio and colleagues <sup>1</sup>    |                                            | 0/30   |                                   | 0/30    |                             | 1/30     |
| Allen and colleagues <sup>5</sup>        |                                            | 0/318  |                                   | 1/318   |                             | 26/318   |
| Anderson and colleagues <sup>7</sup>     |                                            | 0/232  |                                   | 23/232  |                             | 11/232   |
| Buchbinder and colleagues <sup>15</sup>  |                                            | 0/99   |                                   | 0/99    |                             | 6/99     |
| Calligaro and colleagues <sup>17</sup>   |                                            | 0/185  |                                   | 10/185  |                             | 4/185    |
| Corson and colleagues <sup>22</sup>      |                                            | 0/157  |                                   | 5/157   |                             | 4/157    |
| Eibes and colleagues <sup>30</sup>       |                                            | 0/69   |                                   | 2/69    |                             | 2/69     |
| Fiorani and colleagues <sup>36</sup>     |                                            | 0/683  |                                   | 5/683   |                             | 21/683   |
| Forssell and colleagues <sup>37</sup>    |                                            | 0/48   |                                   | 0/48    |                             | 4/48     |
| Godin and colleagues <sup>42</sup>       |                                            | 0/50   |                                   | 0/50    |                             | 1/50     |
| Harbaugh <sup>47</sup>                   |                                            | 2/632  |                                   | 2/632   |                             | 26/632   |
| Hartsell and colleagues <sup>49</sup>    |                                            | 0/116  |                                   | 10/116  |                             | 4/116    |
| Love and colleagues <sup>62</sup>        |                                            | 0/200  |                                   | 0/200   |                             | 23/200   |
| McCleary and colleagues <sup>68</sup>    |                                            | 0/32   |                                   | 0/32    |                             | 1/32     |
| Muskett and colleagues <sup>75</sup>     |                                            | 1/30   |                                   | 0/30    |                             | 1/30     |
| Ombrellaro and colleagues <sup>77</sup>  |                                            | 0/140  |                                   | 0/140   |                             | 28/140   |
| Peitzman and colleagues <sup>83</sup>    |                                            | 1/252  |                                   | 0/252   |                             | 15/252   |
| Quigley and colleagues <sup>86</sup>     |                                            | 0/114  |                                   | 2/114   |                             | 5/114    |
| Sbarigia and colleagues <sup>90</sup>    |                                            | 0/37   |                                   | 0/37    |                             | 1/37     |
| Speziale and colleagues <sup>98</sup>    |                                            | 0/107  |                                   | 2/107   |                             | 2/107    |
| Stone and colleagues <sup>100</sup>      |                                            | 0/67   |                                   | 4/67    |                             | 3/67     |
| Takolander and colleagues <sup>107</sup> |                                            | 0/28   |                                   | 0/28    |                             | 4/28     |
| Total                                    | 0/304                                      | 4/3626 | 9/304                             | 66/3626 | 22/304                      | 193/3626 |

**Table 3** Results for case series of superficial (11 studies) and deep block (28 studies). The numerator represents the number of complications in each category; the denominator represents the total number of patients in the study. The last row represents the sum of the rows above

| Reference                                        | Serious complications as a result of block |         | Conversion to general anaesthesia |         | Total serious complications |          |
|--------------------------------------------------|--------------------------------------------|---------|-----------------------------------|---------|-----------------------------|----------|
|                                                  | Superficial                                | Deep    | Superficial                       | Deep    | Superficial                 | Deep     |
| Burke and colleagues <sup>16</sup>               | 0/175                                      |         | 0/175                             |         | 13/75                       |          |
| Donato and colleagues <sup>29</sup>              | 0/145                                      |         | 0/145                             |         | 10/145                      |          |
| Hafner and Evans <sup>46</sup>                   | 0/1200                                     |         | 0/1200                            |         | 28/1200                     |          |
| Harwood and colleagues <sup>50</sup>             | 0/40                                       |         | 0/40                              |         | 0/40                        |          |
| Lee and colleagues <sup>58</sup>                 | 0/305                                      |         | 0/305                             |         | 12/305                      |          |
| Levin and Schanno <sup>61</sup>                  | 0/53                                       |         | 0/53                              |         | 9/53                        |          |
| Mashiah and colleagues <sup>66</sup>             | 0/39                                       |         | 0/39                              |         | 0/39                        |          |
| Nordstrom and colleagues <sup>76</sup>           | 0/36                                       |         | 1/36                              |         | 1/36                        |          |
| Shifrin and colleagues <sup>95</sup>             | 0/41                                       |         | 0/41                              |         | 0/41                        |          |
| Slutzki and colleagues <sup>97</sup>             | 0/42                                       |         | 0/42                              |         | 4/42                        |          |
| Yared and colleagues <sup>112</sup>              | 0/100                                      |         | 0/100                             |         | 6/100                       |          |
| Agrioglio and colleagues <sup>2</sup>            |                                            | 0/212   |                                   | 0/212   |                             | 9/212    |
| Benjamin and colleagues <sup>9</sup>             |                                            | 1/81    |                                   | 0/81    |                             | 5/81     |
| Bergeron and colleagues <sup>10</sup>            |                                            | 1/67    |                                   | 1/67    |                             | 15/67    |
| Bourke and Crimmins <sup>12</sup>                |                                            | 0/59    |                                   | 0/59    |                             | 2/59     |
| Breek and colleagues <sup>14</sup>               |                                            | 0/100   |                                   | 0/100   |                             | 4/100    |
| Castresana and colleagues <sup>20</sup>          |                                            | 1/28    |                                   | 0/28    |                             | 0/28     |
| Davies and colleagues <sup>25</sup>              |                                            | 0/128   |                                   | 1/128   |                             | 14/128   |
| Davies and colleagues <sup>24</sup>              |                                            | 0/389   |                                   | 14/389  |                             | 34/389   |
| Davies and colleagues <sup>26</sup>              |                                            | 8/1000  |                                   | 41/1000 |                             | 0/1000   |
| Dawson and colleagues <sup>27</sup>              |                                            | 1/26    |                                   | 3/26    |                             | 0/26     |
| Emery and colleagues <sup>31</sup>               |                                            | 0/40    |                                   | 0/40    |                             | 0/40     |
| Erwin and colleagues <sup>32</sup>               |                                            | 0/21    |                                   | 1/21    |                             | 3/21     |
| Faraglia and colleagues <sup>34</sup>            |                                            | 0/35    |                                   | 0/35    |                             | 0/35     |
| Hobson and colleagues <sup>51</sup>              |                                            | 0/43    |                                   | 0/43    |                             | 5/43     |
| Junca and colleagues <sup>53</sup>               |                                            | 0/40    |                                   | 0/40    |                             | 0/40     |
| Lagneau and colleagues <sup>55</sup>             |                                            | 0/137   |                                   | 0/137   |                             | 2/137    |
| Landesberg and colleagues <sup>56</sup>          |                                            | 0/36    |                                   | 0/36    |                             | 7/36     |
| Lawrence and colleagues <sup>57</sup>            |                                            | 1/200   |                                   | 17/200  |                             | 4/200    |
| Leoni and colleagues <sup>59</sup>               |                                            | 0/60    |                                   | 0/60    |                             | 0/60     |
| Marrocco-Trischitta and colleagues <sup>65</sup> |                                            | 0/28    |                                   | 0/28    |                             | 0/28     |
| Merle and colleagues <sup>70</sup>               |                                            | 0/11    |                                   | 0/11    |                             | 0/11     |
| Molnar and colleagues <sup>73</sup>              |                                            | 1/40    |                                   | 0/40    |                             | 0/40     |
| Sbarigia and colleagues <sup>89</sup>            |                                            | 0/50    |                                   | 0/50    |                             | 3/50     |
| Shah and colleagues <sup>94</sup>                |                                            | 0/654   |                                   | 7/654   |                             | 28/654   |
| Silbert and colleagues <sup>96</sup>             |                                            | 0/70    |                                   | 0/70    |                             | 4/70     |
| De Sousa and colleagues <sup>28</sup>            |                                            | 0/198   |                                   | 0/198   |                             | 4/198    |
| Sublett and colleagues <sup>106</sup>            |                                            | 0/18    |                                   | 0/18    |                             | 2/18     |
| Tissot and colleagues <sup>108</sup>             |                                            | 1/15    |                                   | 3/15    |                             | 0/15     |
| Total                                            | 0/2176                                     | 15/3786 | 1/2176                            | 88/3786 | 83/2176                     | 145/3786 |

resulted in more frequent conversions to general anaesthesia and a higher rate of systemic complications.

For non-randomized comparisons of block with general anaesthesia (Table 2), and for case series (Table 3), the incidence of direct complications was higher with deep block. The incidences of conversion to general anaesthesia and systemic complications were similar between the groups for these types of study.

There were a total of 2533 superficial (or intermediate) blocks and 7558 deep (or combined) blocks (Fig. 2). There were no complications arising from block placement in superficial block when compared with 19 (0.25%) in deep ( $P=0.006$ ; odds ratio 2.13; relative risk 2.12). There were 10 (0.39%) conversions to general anaesthesia in superficial when compared with 157 (2.08%) in deep block ( $P<0.0001$ ; odds ratio 5.35; relative risk 5.26). There were a total of 106 (4.18%) serious complications in

superficial when compared with 357 (4.72%) in deep block ( $P=0.273$ ; odds ratio 1.13; relative risk 1.13; NS).

The lower quality evidence in the case reports and letters was not subjected to formal statistical analysis (Table 4). One letter<sup>21</sup> is a brief statement that the authors conducted 28 superficial blocks without complication. Another<sup>19</sup> identifies one seizure in a series of 81 patients which the authors felt was due to local anaesthetic toxicity (due to either the deep block or a top-up by the surgeon). The same authors describe two additional patients who returned to theatre but, because the reasons were not discussed, we did not include these as block complications.

Of the specific complications that occurred with placement of the (deep) block, the most common was intravascular injection, followed by respiratory failure or distress (due to presumed or confirmed diaphragmatic or vocal cord paralysis) (Table 5).



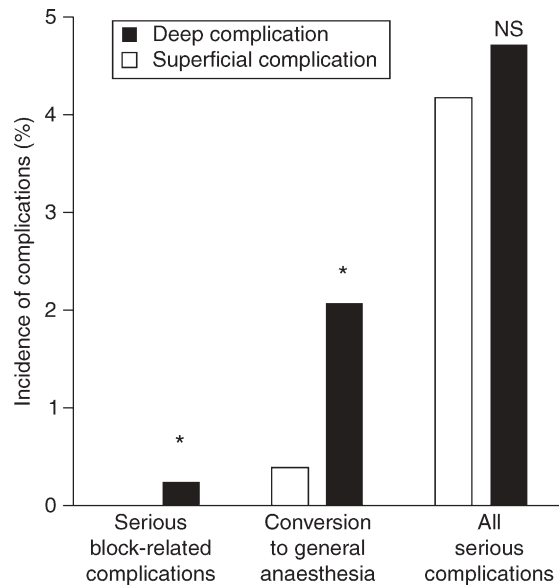

**Fig 2** For each of the three categories of complication, the numerators and denominators in Tables 1–4 are summed, and the ratio expressed as a percentage incidence. \*Indicates that comparisons between deep and superficial block for each category of complication were statistically significant; NS indicates not statistically significant.

The most common reasons to convert to general anaesthesia were block failure, accounting for 40% (all of which occurred with deep block, 69 conversions) and patient anxiety or lack of co-operation, accounting for 45% (66 instances with deep; nine with superficial block). The remaining reasons to convert were insertion of a shunt (11%; 17 patients) and direct complication of block (3%; five patients) with deep block, and shunt insertion (one patient) with superficial block.

The most frequent systemic complications in the perioperative period involved CNS sequelae (e.g. stroke or

TIA) and cardiovascular problems. The former accounted for 56% (70 with superficial block and 191 with deep block). Cardiovascular problems accounted for 23% of the complications: only five in superficial block but 103 in deep block. There were 15 perioperative deaths in the superficial block group and 38 in the deep block group (representing 11% of the complications). The remaining systemic complications were: significant wound haematoma (7%; 13 cases with superficial, 20 cases with deep block) and airway or respiratory complications (three with superficial and five with deep block).

The number of publications has steadily increased over the years (Fig. 3A), with deep block reports consistently more numerous than superficial. Although a single paper using deep block appeared before 1975, papers using superficial block clearly appeared very soon after that, so there is no persuasive evidence that certain epochs exclusively favoured one block type over another. The number of case reports of complications (all of which are for deep block) also increased in line with these trends over the years. The number of patients undergoing blocks in the papers mirrored these trends (Fig. 3B), perhaps with the exception of a single large trial of superficial block in 1988.<sup>46</sup>

## Discussion

The main conclusion of this review is that the deep block is more than twice as likely to yield a serious life-threatening complication as a result of block placement than is the superficial block. The absolute incidence of block-related complications is, however, low in both groups. Perhaps surprisingly, we also found that the deep block is ~5 times more likely to 'fail' and be converted to general anaesthesia than is the superficial block. As we

**Table 4** Results for case reports concerning complications of deep block (there were no case reports describing complications with superficial block). The numerator represents the number of complications in each category; the denominator represents the total number of patients in the case report. The last row represents the sum of the rows above

| Reference                                  | Serious complications as a result of block |       | Conversion to general anaesthesia |      | Total serious complications |      |
|--------------------------------------------|--------------------------------------------|-------|-----------------------------------|------|-----------------------------|------|
|                                            | Superficial                                | Deep  | Superficial                       | Deep | Superficial                 | Deep |
| Bourke and Thomas <sup>13</sup>            |                                            | 0/1   |                                   | 0/1  |                             | 0/1  |
| Carling and Simmonds <sup>18</sup>         |                                            | 2/2   |                                   | 2/2  |                             | 1/2  |
| Goldberg <sup>43</sup>                     |                                            | 1/1   |                                   | 0/1  |                             | 0/1  |
| Grundy and colleagues <sup>45</sup>        |                                            | 0/1   |                                   | 0/1  |                             | 1/1  |
| Harris and Benveniste <sup>48</sup>        |                                            | 2/2   |                                   | 0/2  |                             | 0/2  |
| Cockroft and Brownlow <sup>21</sup>        | 0/28                                       |       | 0/28                              |      | 0/28                        |      |
| Carling and Simmonds <sup>19</sup>         |                                            | 1/81  |                                   | 0/81 |                             | 0/81 |
| Johnson <sup>52</sup>                      |                                            | 1/1   |                                   | 0/1  |                             | 0/1  |
| Kwok and colleagues <sup>54</sup>          |                                            | 1/1   |                                   | 1/1  |                             | 0/1  |
| Levelle and Martinez <sup>60</sup>         |                                            | 1/1   |                                   | 1/1  |                             | 2/2  |
| Madi-Jebara and colleagues <sup>63</sup>   |                                            | 0/2   |                                   | 0/2  |                             | 0/2  |
| Spiegelberger and colleagues <sup>99</sup> |                                            | 0/2   |                                   | 0/2  |                             | 1/2  |
| Stoneham and Wakefield <sup>103</sup>      |                                            | 1/1   |                                   | 0/1  |                             | 0/1  |
| Stoneham and Bree <sup>101</sup>           |                                            | 0/1   |                                   | 0/1  |                             | 0/1  |
| Weiss and colleagues <sup>109</sup>        |                                            | 1/1   |                                   | 1/1  |                             | 0/1  |
| Total                                      | 0/28                                       | 11/98 | 0/28                              | 5/98 | 0/28                        | 5/98 |

**Table 5** Detailed analysis of specific types of direct complications of placement of cervical plexus block. All studies relate to deep block. In many cases, the specific cause of the direct complication was speculative or probable, rather than proven. The last column indicates the total number of complications in this category for that study (numerator) and the number of patients studied (denominator)

| Reference                               | Intravascular injection | Intrathecal injection | Respiratory failure/distress (e.g. due to diaphragmatic or vocal cord paralysis) | Local anaesthetic toxicity | Total  |
|-----------------------------------------|-------------------------|-----------------------|----------------------------------------------------------------------------------|----------------------------|--------|
| Harbaugh <sup>47</sup>                  | 2                       |                       |                                                                                  |                            | 2/632  |
| Muskett and colleagues <sup>75</sup>    | 1                       |                       |                                                                                  |                            | 1/30   |
| Peitzman and colleagues <sup>83</sup>   |                         |                       | 1                                                                                |                            | 1/252  |
| Benjamin and colleagues <sup>9</sup>    | 1                       |                       |                                                                                  |                            | 1/81   |
| Bergeron and colleagues <sup>10</sup>   | 1                       |                       |                                                                                  |                            | 1/67   |
| Castresana and colleagues <sup>20</sup> |                         |                       | 1                                                                                |                            | 1/28   |
| Davies and colleagues <sup>26</sup>     | 5                       |                       | 1                                                                                | 2                          | 8/1000 |
| Dawson and colleagues <sup>27</sup>     | 1                       |                       |                                                                                  |                            | 1/26   |
| Lawrence and colleagues <sup>57</sup>   |                         |                       |                                                                                  | 1                          | 1/200  |
| Molnar and colleagues <sup>73</sup>     | 1                       |                       |                                                                                  |                            | 1/40   |
| Tissot and colleagues <sup>108</sup>    |                         |                       |                                                                                  | 1                          | 1/15   |
| Carling and Simmonds <sup>18</sup>      |                         | 1                     | 1                                                                                |                            | 2/2    |
| Goldberg <sup>43</sup>                  |                         | 1                     |                                                                                  |                            | 1/1    |
| Harris and Benveniste <sup>48</sup>     |                         |                       | 2                                                                                |                            | 2/2    |
| Carling and Simmonds <sup>19</sup>      |                         |                       |                                                                                  | 1                          | 1/81   |
| Johnson <sup>52</sup>                   | 1                       |                       |                                                                                  |                            | 1/1    |
| Kwok and colleagues <sup>54</sup>       |                         |                       | 1                                                                                |                            | 1/1    |
| Levelle and Martinez <sup>60</sup>      |                         |                       | 1                                                                                |                            | 1/2    |
| Stoneham and Wakefield <sup>103</sup>   |                         |                       | 1                                                                                |                            | 1/1    |
| Weiss and colleagues <sup>109</sup>     |                         |                       | 1                                                                                |                            | 1/1    |
| Total                                   | 13                      | 2                     | 10                                                                               | 5                          | —      |

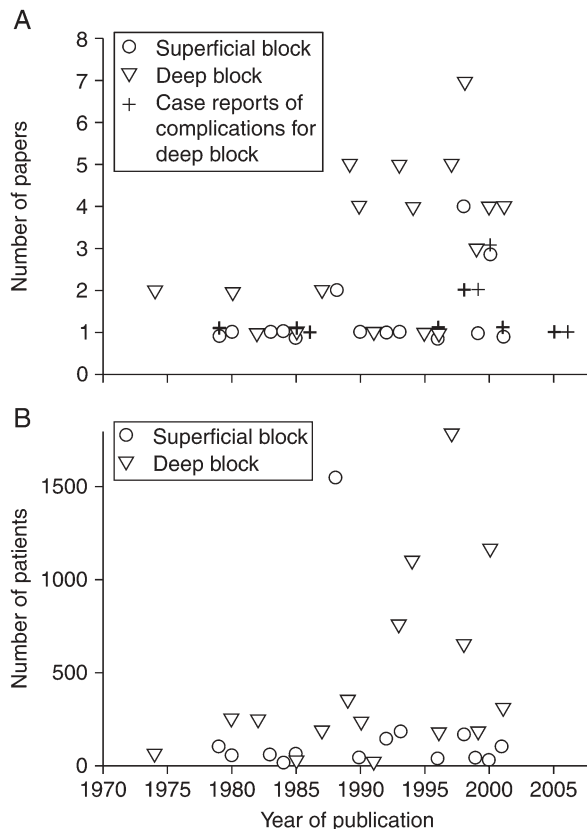

**Fig 3** (A) Plot of number of papers published for each year, describing the use of: deep block, superficial block, and case reports of complications which are all for deep block. (B) Plot of number of patients undergoing each type of block in the published papers: deep block and superficial block.

expected, there was no difference in the incidence of serious systemic complications between the blocks.

Before we consider the implications of these results for clinical practice, it is important to consider some limitations and strengths of the methods of our review.

Only two of the studies in our analysis were themselves randomized controlled trials (RCTs) which directly addressed the question we posed.<sup>79 102</sup> The Quality of Reporting of Meta-analyses (QUORUM) guidelines emphasize the inclusion of only RCTs<sup>71</sup> and, clearly, our approach was unable to meet these standards due to the paucity of RCTs available. However, the MOOSE guidelines facilitate the inclusion of case series, studies with historical controls, and observational studies, enabling relevant conclusions to be drawn.<sup>105</sup> Nonetheless, the strongest evidence comes from RCTs, and it is important to note that in our analysis, the two RCTs did not differ in their outcomes,<sup>79 102</sup> it was only when data from non-randomized studies are included that differences emerge.

Regardless of adherence to published guidelines, all quantitative systematic reviews or meta-analyses suffer common criticisms, inherent to the technique, which have been discussed elsewhere.<sup>35</sup> There is a concern that it is not valid to combine the results of different studies that were originally designed and conducted at different times, and that had different primary end-points, to answer a 'new' question. Since the primary aim of some of the original studies may not have been to assess complication rate, we cannot be certain that they reported this faithfully. We cannot be certain that we retrieved all published studies, though we are confident that by searching the

main databases it is unlikely that we have missed large or important studies. It is a strength of our systematic approach that we obtained data from non-surgical, non-anaesthetic, and relatively obscure sources.<sup>1 12 14 15 28 66 95</sup> Given these limitations, our conclusions cannot be regarded as definite ‘proof’ of differences between deep and superficial block. Rather, our analysis forms one part of the evidence base.

We included papers from the 1970s.<sup>51 99 106 112</sup> While this added to the completeness of our study, it might be argued that clinical practice has changed since then and it is unjustified to include such work. Furthermore, we did not seek to make direct contact with the authors of all the papers we retrieved. Though desirable, such a venture would have been itself limited by the age of some of the papers and the likely difficulty of making fruitful contact.

We noted that there was no consistency in papers for the definition of ‘perioperative death’ or duration of follow-up to establish such complications. Definitions and follow-up commonly varied from anywhere within the first 24 h after surgery<sup>88</sup> to within 1 month<sup>38</sup> (although one study followed-up patients for 1 yr post-surgery<sup>67</sup>), or it was not defined.<sup>34</sup> We therefore accepted any death classed as ‘perioperative’ by the original authors, so any bias in their classification was not eliminated by our methodology.

We did not search for, or include, unpublished or internal reports, pharmaceutical industry data, or non-peer-reviewed journals. We were careful to exclude case reports from the quantitative analysis. These are published for a variety of reasons and do not necessarily reflect the frequency with which complications arise. Nonetheless, Gillman<sup>41</sup> has recently emphasized the importance of considering evidence from case reports when assessing complications (as opposed to treatment efficacy), and we were impressed with the finding that all adverse events reported concerned the deep block (Table 4).

We restricted our analysis to English language publications. We concede that this may be a possible source of bias: there is evidence that German-based studies with positive results are more likely to be published in English than studies with negative results.<sup>72</sup> However, there is no reason to suppose that such bias would favour one block type over the other.

We are aware that some centres routinely use cervical epidural anaesthesia to facilitate endarterectomy surgery,<sup>11</sup> and we specifically excluded this type of block from our consideration. This was not because we felt cervical epidural to be unimportant, ineffective, or without complications, but that our main consideration was side-effects of superficial and deep cervical plexus injections.

Cervical plexus blocks are also used in thyroid surgery<sup>8</sup> and, by excluding these, we missed some potentially relevant data. However, these blocks are usually bilateral<sup>8</sup> and there are valid statistical reasons to avoid combining data from bilateral with unilateral procedures.<sup>4</sup> Surgical and systemic side-effects differ for thyroid and carotid

artery surgery, so combining these would not be meaningful. A separate systematic review of complication rates for cervical blocks in thyroid surgery may be of use.

In our analysis, we included data from studies that compared one block with general anaesthesia, and we selected data from only the ‘block’ group of patients (Tables 1 and 2). This is an established approach for dealing with data from case series<sup>44 64</sup> and is an appropriate method to assess the rate of complications but is less valid for efficacy of interventions. For this reason, we have been careful to regard the incidence of conversion to general anaesthesia only as a crude measure of efficacy to be interpreted with caution. An important advantage of our systematic approach was that it revealed instances where authors appeared to have used the same data set in more than one publication.<sup>7 47 82 87</sup>

If the conversion rate to general anaesthesia reflects success, then superficial performed better than deep block. Clearly, both techniques are used routinely in major centres without a subjective feeling that one is more effective than the other, and this is borne out by the two randomized studies.<sup>79 102</sup> Nonetheless, there are a number of possible reasons why superficial block might be more effective. First, at least part of the higher incidence of conversion in the deep block group relates to the higher incidence of direct block complications. Secondly, the deep block is more technically challenging and, if undertaken by relatively inexperienced practitioners,<sup>100</sup> might conceivably lead to it performing less well. Indeed, since it is sometimes performed as a three-injection technique, this theoretically increases the risk of direct complication and might plausibly lead to reduced efficacy. However, not all papers specified whether a three-injection or single injection method was used, making it impossible for us to analyse this. Conversion rate to general anaesthesia is certainly a crude measure of block efficacy. It might simply reflect different thresholds in different centres for regarding the block as ‘failed’. A better measure might be the amount of local anaesthetic supplementation by the surgeon, but these data are presented in very few reports, the two RCTs being exceptions.<sup>79 102</sup>

We found the incidence of serious systemic complications to be similar in the two groups. There is no *a priori* reason to suppose that one block has a systemic protective effect over another, and we were reassured that our analysis had not yielded any spurious results in this regard.

In the UK, a trial is underway comparing regional block vs general anaesthesia for carotid endarterectomy ([www.galatrial.com](http://www.galatrial.com)). The trial protocol allows for use of superficial block and deep injection. The results of this trial may therefore enable a subgroup analysis to compare with the complication rates we report here.

In summary, we report the safety of the superficial/intermediate cervical plexus block when used alone when compared with any technique that uses a deep injection.



If the two techniques are equally effective, it would seem appropriate in most cases to employ the technique with the lower incidence of adverse side-effects. From analysis of 2500 cases and 30 yr of publications, it appears that no single instance of a serious complication related to placement of a superficial/intermediate block has ever been formally described.

## Acknowledgements

We thank Professor Henry McQuay FRCA, Nuffield Department of Anaesthetics, John Radcliffe Hospital, Oxford OX3 9DU, UK, for his guidance, his assistance with statistical analysis, and his comments on the manuscript.

## References

- Agrifoglio G, Agus GB, Bonalumi F, Costantini A, Carlesi R. The role of regional nerve block anesthesia for carotid endarterectomy: an experimental comparison with previous series with the use of general anesthesia and barbiturates for cerebral protection. *Int Angiol* 1987; **6**: 365–70
- Agrifoglio G, Bonalumi FA. Prediction of cerebral ischaemia using loco-regional anaesthesia. *Eur J Vasc Surg* 1993; **7**(Suppl A): 13–5
- Allen BT, Anderson CB, Rubin BG, et al. The influence of anesthetic technique on perioperative complications after carotid endarterectomy. *J Vasc Surg* 1994; **19**: 834–42
- Altman DG, Bland JM. Units of analysis. *Br Med J* 1997; **314**: 1874
- Altman DG, Bland M. *Practical Statistics for Medical Research*. London: Chapman and Hall, 1990
- Altman DG, Bland JM. The odds ratio. *Br Med J* 2000; **320**: 1468
- Anderson CA, Rich NM, George JC, Paul TM. Carotid endarterectomy: regional versus general anesthesia. *Am Surg* 1980; **46**: 323–7
- Aunac S, Carlier M, Simgelyn F, De Kock M. The analgesic efficacy of bilateral combined superficial and deep cervical plexus block administered before thyroid surgery under general anesthesia. *Anesth Analg* 2002; **95**: 746–50
- Benjamin ME, Silva MB, Watt C, McCaffrey MT, Burford-Foggs A, Flinn WR. Awake patient monitoring to determine the need for shunting during carotid endarterectomy. *Surgery* 1993; **114**: 673–9
- Bergeron P, Benichou H, Dupont M, et al. Carotid surgery under cervical block anesthesia: a simple method of heart and brain protection in high risk patients. *Int Angiol* 1989; **8**: 70–80
- Bonnet F, Derosier JP, Pluskwa F, Abhay K, Gaillard A. Cervical epidural anaesthesia for carotid artery surgery. *Can J Anaesth* 1990; **37**: 353–8
- Bourke BM, Crimmins DC. Overnight hospital stay for carotid endarterectomy. *Med J Aust* 1998; **168**: 157–60
- Bourke DL, Thomas P. Mandibular nerve block in addition to cervical plexus block for carotid endarterectomy. *Anesth Analg* 1998; **87**: 1034–6
- Breek JC, Peters N, Dewitte R, Bleyen J. Carotid surgery under locoregional anaesthesia Description of technique and results of our first 100 consecutive operations. *Acta Chir Belg* 1994; **94**: 274–6
- Buchbinder D, Melick CF, Garcia P, Leand PM. Regional/local anesthesia: a safe and reasonable choice for patients undergoing carotid endarterectomy. *Maryland Med J* 1997; **46**: 125–30
- Burke PE, Prendiville E, Tadros E, Colgan MP, Moore DJ, Shanik DG. Contralateral stenosis and stump pressures: parameters to identify the high risk patient undergoing carotid endarterectomy under local anesthesia. *Eur J Vasc Surg* 1993; **7**: 317–9
- Calligaro KD, Dougherty MJ, Lombardi J, Krug R, Raviola CA. Converting from general anesthesia to cervical block anesthesia for carotid endarterectomy. *Ann Vasc Surg* 2001; **35**: 103–6
- Carling A, Simmonds M. Complications from regional anaesthesia for carotid endarterectomy. *Br J Anaesth* 2000; **84**: 797–800
- Carling A, Simmonds M. The interscalene approach to the cervical plexus. *Br J Anaesth* 2000; **85**: 661–2
- Castresana MR, Masters RD, Castresana EJ, Stefansson S, Shaker IJ, Newman WH. Incidence and clinical significance of hemidiaphragmatic paresis in patients undergoing carotid endarterectomy during cervical plexus block anesthesia. *J Neurosurg Anesthesiol* 1994; **6**: 21–3
- Cockroft S, Brownlow H. The interscalene approach to the cervical plexus. *Br J Anaesth* 2000; **85**: 661
- Corson JD, Chang BB, Shah DM, Leather RP, DeLeo BM, Karmody AM. The influence of anesthetic choice on carotid endarterectomy outcome. *Arch Surg* 1987; **122**: 807–12
- Davies MJ, Dysart RH, Silbert BS, Scott DA, Cook RJ. Prevention of tachycardia with atenolol pretreatment for carotid endarterectomy under cervical plexus blockade. *Anaesth Intensive Care* 1992; **20**: 161–4
- Davies MJ, Mooney PH, Scott DA, Silbert BS, Cook RJ. Neurologic changes during carotid endarterectomy under cervical plexus block predict a high risk of postoperative stroke. *Anesthesiology* 1993; **78**: 829–33
- Davies MJ, Murrell GCV, Cronin KD, Meads AC, Dawson A. Carotid endarterectomy under cervical plexus block—a prospective clinical audit. *Anaesth Intensive Care* 1990; **18**: 219–23
- Davies MJ, Silbert BS, Scott DA, Cook RJ, Mooney PH, Blyth C. Superficial and deep cervical plexus block for carotid artery surgery: a prospective study of 1000 blocks. *Reg Anesth* 1997; **22**: 442–6
- Dawson AR, Dysart RH, Amerena JV, et al. Arterial lignocaine concentrations following cervical plexus blockade for carotid endarterectomy. *Anaesth Intensive Care* 1991; **9**: 197–200
- De Sousa AA. Carotid endarterectomy under regional anesthesia. *Neurol Med Chir (Tokyo)* 1998; **38**(Suppl): 279–83
- Donato AT, Hill SL. Carotid arterial surgery using local anesthesia: a private practice retrospective study. *Am Surg* 1992; **58**: 446–50
- Eibes TA, Gross WS. The influence of anesthetic technique on perioperative blood pressure control after carotid endarterectomy. *Am Surg* 2000; **66**: 641–7
- Emery G, Handley G, Davies MJ, Mooney PH. Incidence of phrenic nerve block and hypercapnia in patients undergoing carotid endarterectomy under cervical plexus block. *Anaesth Intensive Care* 1998; **26**: 377–81
- Erwin D, Pick MJ, Taylor GW. Anaesthesia for carotid surgery. *Anaesthesia* 1980; **35**: 256–9
- Eypasch E, Lefering R, Kum CK, Troidl H. Probability of adverse events that have not yet occurred: a statistical reminder. *Br Med J* 1995; **311**: 619–20
- Faraglia V, Sbarigia E, Speziale F, Taurino M, Massa R, Fiorani P. An external carotid artery shunt to prevent cerebral ischaemia during carotid surgery. *Eur J Vasc Surg* 1990; **4**: 385–9

- 35 Feinstein AR. Meta-analysis: statistical alchemy for the 21st century. *J Clin Epidemiol* 1995; **48**: 71–9
- 36 Fiorani P, Sbarigia E, Speziale F, et al. General anaesthesia versus cervical block and perioperative complications in carotid artery surgery. *Eur J Vasc Endovasc Surg* 1997; **13**: 37–42
- 37 Forssell C, Takolander R, Bergqvist D. Pressure measurements as predictors for perioperative neurologic deficits in carotid surgery. *Eur J Vasc Surg* 1990; **4**: 153–8
- 38 Forssell C, Takolander R, Bergqvist D, Johansson A, Persson NH. Local versus general anaesthesia in carotid surgery. A prospective, randomised study. *Eur J Vasc Surg* 1989; **3**: 503–9
- 39 Gabelman CG, Gann DS, Ashworth CJ Jr, Carney WL. One hundred consecutive carotid reconstructions: local versus general anesthesia. *Am J Surg* 1983; **145**: 477–82
- 40 Giannoni MF, Sbarigia E, Panico MA, et al. Intraoperative transcranial Doppler sonography monitoring during carotid surgery under locoregional anaesthesia. *Eur J Vasc Endovasc Surg* 1996; **12**: 407–11
- 41 Gillman PK. Extracting value from case reports: lessons from serotonin toxicity. *Anaesthesia* 2006; **61**: 419–22
- 42 Godin MS, Bell WH, Schwedler M, Kerstein MD. Cost effectiveness of regional anesthesia in carotid endarterectomy. *Am Surg* 1989; **55**: 656–9
- 43 Goldberg MJ. Complication of cervical plexus block or fugue state? *Anesth Analg* 1995; **81**: 1108–9
- 44 Graham G. Tissue plasminogen activator for acute ischemic stroke in clinical practice: a meta-analysis of safety data. *Stroke* 2003; **34**: 2847–50
- 45 Grundy BL, Webster MW, Richey ET, Karanjia PN. EEG changes during carotid endarterectomy: drug effect and embolism. *Br J Anaesth* 1985; **57**: 445–7
- 46 Hafner CD, Evans WE. Carotid endarterectomy with local anesthesia: results and advantages. *J Vasc Surg* 1988; **7**: 232–9
- 47 Harbaugh RE. Carotid endarterectomy using regional anesthesia. *Neurosurg Clin N Am* 2000; **11**: 299–307
- 48 Harris RJ, Benveniste G. Recurrent laryngeal nerve blockade in patients undergoing carotid endarterectomy under cervical plexus block. *Anaesth Intensive Care* 2000; **28**: 431–3
- 49 Hartsell PA, Calligaro KD, Syrek JR, Dougherty MJ, Raviola CA. Postoperative blood pressure changes associated with cervical block versus general anesthesia following carotid endarterectomy. *Ann Vasc Surg* 1999; **13**: 104–8
- 50 Harwood TN, Butterworth JF, Colonna DM, Samuel M. Plasma bupivacaine concentrations and effects of epinephrine after superficial cervical plexus blockade in patients undergoing carotid endarterectomy. *J Cardiothorac Vasc Anesth* 1999; **13**: 703–6
- 51 Hobson RW, Wright CB, Sublett JW, Fedde CW, Rich NM. Carotid artery back pressure and endarterectomy under regional anesthesia. *Arch Surg* 1974; **109**: 682–7
- 52 Johnson TR. Transient ischaemic attack during deep cervical plexus block. *Br J Anaesth* 1999; **83**: 965–7
- 53 Junca A, Marret E, Goursot G, Mazoit X, Bonnet F. A comparison of ropivacaine and bupivacaine for cervical plexus block. *Anesth Analg* 2001; **92**: 720–4
- 54 Kwok AO, Silbert BS, Allen KJ, Bray PJ, Vidovich J. Bilateral vocal cord palsy during carotid endarterectomy under cervical plexus block. *Anesth Analg* 2006; **102**: 376–7
- 55 Lagneau P, Baujat B, Anidjar S, et al. Is transcranial Doppler a worthwhile examination for preoperative evaluation of the circle of Willis? Evaluation of 137 carotid endarterectomies performed under regional anesthesia. *Int Angiol* 1998; **17**: 168–70
- 56 Landesberg G, Erel J, Anner H, et al. Perioperative myocardial ischemia in carotid endarterectomy under cervical plexus block and prophylactic nitroglycerin infusion. *J Cardiothorac Vasc Anesth* 1993; **7**: 259–65
- 57 Lawrence PF, Alves JC, Jicha D, Bhirangi K, Dobrin PB. Incidence, timing, and causes of cerebral ischemia during carotid endarterectomy with regional anesthesia. *J Vasc Surg* 1998; **27**: 329–34
- 58 Lee KS, Davis CH, McWhorter JM. Low morbidity and mortality of carotid endarterectomy performed with regional anesthesia. *J Neurosurg* 1988; **69**: 483–7
- 59 Leoni A, Magrin S, Mascotto G, et al. Cervical plexus anesthesia for carotid endarterectomy: comparison of ropivacaine and mepivacaine. *Can J Anaesth* 2000; **47**: 185–7
- 60 Levelle JP, Martinez OA. Airway obstruction after bilateral carotid endarterectomy. *Anesthesiology* 1985; **63**: 220–2
- 61 Levin BH, Schanno JF. Local anesthesia serious consideration for extracranial carotid artery surgery. *Am Surg* 1980; **46**: 174–9
- 62 Love A, Holyoak MA. Carotid endarterectomy and local anaesthesia: reducing the disasters. *Cardiovasc Surg* 2000; **8**: 429–35
- 63 Madi-Jebara S, Yazigi A, Haddad F, Hayek G. Severe dental pain during carotid endarterectomy under cervical plexus block. *J Cardiothorac Vasc Anesth* 2001; **15**: 356–7
- 64 Mangus RS, Haag BW. Stented versus nonstented extravascular ureterocystostomy in renal transplantation: a metanalysis. *Am J Transplant* 2004; **4**: 1889–96
- 65 Marrocco-Trischitta MM, Bandiera G, Camilli S, Stillo F, Cirielli C, Guerrini P. Remifentanyl conscious sedation during regional anaesthesia for carotid endarterectomy: rationale and safety. *Eur J Vasc Endovasc Surg* 2001; **22**: 405–9
- 66 Mashiah A, Soroker D, Pasik S, Mashiah T. Carotid surgery under local anesthesia in the elderly. *J Am Geriatr Soc* 1988; **36**: 545–7
- 67 McCarthy RJ, Walker R, McAteer P, Budd JS, Horrocks M. Patient and hospital benefits of local anaesthesia for carotid endarterectomy. *Eur J Vasc Endovasc Surg* 2001; **22**: 13–8
- 68 McCleary AJ, Dearden NM, Dickson DH, Watson A, Gough MJ. The differing effects of regional and general anaesthesia on cerebral metabolism during carotid endarterectomy. *Eur J Vasc Endovasc Surg* 1996; **12**: 173–81
- 69 McGlade DP, Murphy PM, Davies MJ, Scott DA, Silbert BS. Comparative effects of plain and epinephrine-containing bupivacaine on the hemodynamic response to cervical plexus anesthesia in patients undergoing carotid endarterectomy. *J Cardiothorac Vasc Anesth* 1996; **10**: 593–7
- 70 Merle JC, Mazoit JX, Desgranges P, et al. A comparison of two techniques for cervical plexus blockade: evaluation of efficacy and systemic toxicity. *Anesth Analg* 1999; **89**: 1366–70
- 71 Moher D, Cook DJ, Eastwood S, Olkin I, Rennie D, Stroup DF. Improving the quality of reports of meta-analyses of randomised controlled trials: the QUORUM statement. *Lancet* 1999; **354**: 1896–900
- 72 Moher D, Fortin P, Jadad AR, et al. Completeness of reporting of trials published in languages other than English: implications for conduct and reporting of systematic reviews. *Lancet* 1996; **347**: 363–6
- 73 Molnar RR, Davies MJ, Scott DA, Silbert BS, Mooney PH. Comparison of clonidine and epinephrine in lidocaine for cervical plexus block. *Reg Anesth* 1997; **22**: 137–42
- 74 Moore DC. *Regional Block: A Handbook for Use in Clinical Practice of Medicine and Surgery*, 4th Edn. Springfield, IL: Charles C Thomas, 1979
- 75 Muskett A, McGreevy J, Miller M. Detailed comparison of regional and general anesthesia for carotid endarterectomy. *Am J Surg* 1986; **152**: 691–4

- 76 Nordstrom O, Potemkowski A, Johansson R, et al. Local anaesthesia and propofol-fentanyl sedation for carotid artery surgery. *Acta Anaesthesiol Scand* 1996; **40**: 724–8
- 77 Ombrellaro MP, Freeman MB, Stevens SL, Goldman MH. Effect of anesthetic technique on cardiac morbidity following carotid artery surgery. *Am J Surg* 1996; **171**: 387–90
- 78 Pandit JJ. Correct nomenclature of superficial cervical plexus blocks. *Br J Anaesth* 2004; **92**: 775
- 79 Pandit JJ, Bree S, Dillon P, Elcock D, McLaren ID, Crider B. A comparison of superficial versus combined (superficial and deep) cervical plexus block for carotid endarterectomy: a prospective, randomized study. *Anesth Analg* 2000; **91**: 781–6
- 80 Pandit JJ, Dutta D, Morris JF. Spread of injectate with superficial cervical plexus block in humans: an anatomical study. *Br J Anaesth* 2003; **91**: 733–5
- 81 Pandit JJ, McLaren ID, Crider B. Efficacy and safety of the superficial cervical plexus block for carotid endarterectomy. *Br J Anaesth* 1993; **83**: 970–1
- 82 Papavasiliou AK, Magnadottir HB, Gonda T, Franz D, Harbaugh RE. Clinical outcomes after carotid endarterectomy: comparison of the use of regional and general anesthetics. *J Neurosurg* 2000; **92**: 291–6
- 83 Peitzman AB, Webster MW, Loubeau JM, Grundy BL, Bahnson HT. Carotid endarterectomy under regional (conductive) anesthesia. *Ann Surg* 1982; **196**: 59–64
- 84 Pick MJ, Taylor GW. Selective shunting on the basis of carotid clamping under regional anesthesia. *Int Anesthesiol Clin* 1984; **22**: 129–35
- 85 Prough DS, Scuderi PE, Stullken E, Davis CH. Myocardial infarction following regional anaesthesia for carotid endarterectomy. *Can Anaesth Soc J* 1984; **31**: 192–6
- 86 Quigley TM, Ryan WR, Morgan S. Patient satisfaction after carotid endarterectomy using a selective policy of local anesthesia. *Am J Surg* 2000; **179**: 382–5
- 87 Rich NM, Hobson RW. Carotid endarterectomy under regional anesthesia. *Am Surg* 1975; **41**: 253–9
- 88 Sbarigia E, DarioVizza C, Antonini M, et al. Locoregional versus general anesthesia in carotid surgery: is there an impact on peri-operative myocardial ischemia? Results of a prospective monocentric randomized trial. *J Vasc Surg* 1999; **30**: 131–8
- 89 Sbarigia E, Schioppa A, Misuraca M, et al. Somatosensory evoked potentials versus locoregional anaesthesia in the monitoring of cerebral function during carotid artery surgery: preliminary results of a prospective study. *Eur J Vasc Endovasc Surg* 2001; **21**: 413–6
- 90 Sbarigia E, Speziale F, Colonna M, et al. The selection for shunting in patients with severe bilateral carotid lesions. *Eur J Vasc Surg* 1993; **7**(Suppl A): 3–7
- 91 Schwartz RA, Peterson GJ, Noland KA, Hower JF, Naumheim KS. Intraoperative duplex scanning after carotid artery reconstruction: a valuable tool. *J Vasc Surg* 1988; **7**: 620–4
- 92 Scott DB. Cervical plexus block. In: Scott DB, ed. *Techniques of Regional Anaesthesia*. Norwalk, CT: Appleton and Lange, 1989; 74–7
- 93 Scuderi PE, Prough DS, Davis CH, Balestrieri FJ, McWhorter JM, Howard G. The effects of regional and general anesthesia on blood pressure control after carotid endarterectomy. *J Neurosurg Anesthesiol* 1989; **1**: 41–5
- 94 Shah DM, Darling RC, Chang BB, Bock DE, Paty PS, Leather RP. Carotid endarterectomy in awake patients: its safety, acceptability, and outcome. *J Vasc Surg* 1994; **19**: 1015–9
- 95 Shifrin EG, Gertel M, Anner H, Olshwang D, Levy P. Local anesthesia in carotid endarterectomy: an alternative method. *Isr J Med Sci* 1985; **21**: 511–3
- 96 Silbert BS, Koumoundouros E, Davies MJ, Cronin KD. Comparison of the processed electroencephalogram and awake neurological assessment during carotid endarterectomy. *Anaesth Intensive Care* 1989; **17**: 298–304
- 97 Slutzki S, Behar M, Negri M, Hod G, Zaidenstein L, Bogokowsky H. Carotid endarterectomy under local anesthesia supplemented with neuroleptic analgesia. *Surg Gynecol Obstet* 1990; **170**: 141–4
- 98 Speziale F, Taurino M, Faraglia V, Colonna M, Sbarigia E. Haemodynamic changes and immediate results during carotid artery surgery under general or local anesthesia. In: Strano A, Novo S, eds. *Advances in Vascular Pathology*. New York: Elsevier, 1989; 427–31
- 99 Spiegelberger L, Turndorf H, Culliford A, Imparato A. Hand-held toy squeaker during carotid endarterectomy in the awake patient. *Arch Surg* 1979; **114**: 103–4
- 100 Stone ME, Kunjummen BJ, Moran JC, Wilkerson DK, Zatina MA. Supervised training of general surgery residents in carotid endarterectomy performed on awake patients under regional block is safe and desirable. *Am Surg* 2000; **66**: 781–6
- 101 Stoneham MD, Bree SE. Epileptic seizure during awake carotid endarterectomy. *Anesth Analg* 1999; **89**: 885–6
- 102 Stoneham MD, Doyle AR, Knighton JD, Dorje P, Stanley JC. Prospective, randomized comparison of deep or superficial cervical plexus block for carotid endarterectomy surgery. *Anesthesiology* 1998; **89**: 907–12
- 103 Stoneham MD, Wakefield TW. Acute respiratory distress after deep cervical plexus block. *J Cardiothorac Vasc Anesth* 1998; **12**: 197–8
- 104 Stoughton J, Nath RL, Abbott WM. Comparison of simultaneous electroencephalographic and mental status monitoring during carotid endarterectomy with regional anesthesia. *J Vasc Surg* 1998; **28**: 1014–21
- 105 Stroup DF, Berlin JA, Morton SC, et al. Meta-analysis of observational studies in epidemiology: a proposal for reporting. Meta-analysis Of Observational Studies in Epidemiology (MOOSE) group. *J Am Med Assoc* 2000; **283**: 2008–12
- 106 Sublett JW, Seidenberg AB, Hobson RW. Internal carotid artery stump pressures during regional anesthesia. *Anesthesiology* 1974; **41**: 505–8
- 107 Takolander R, Bergqvist D, Hulthen UL, Johansson A, Katzman PL. Carotid artery surgery. Local versus general anaesthesia as related to sympathetic activity and cardiovascular effects. *Eur J Vasc Surg* 1990; **4**: 265–70
- 108 Tissot S, Frering B, Gagnieu MC, Vallon JJ, Motin J. Plasma concentrations of lidocaine and bupivacaine after cervical plexus block for carotid surgery. *Anesth Analg* 1997; **84**: 1377–9
- 109 Weiss A, Isselhorst C, Gahlen J, et al. Acute respiratory failure after deep cervical plexus block for carotid endarterectomy as a result of bilateral recurrent laryngeal nerve paralysis. *Acta Anaesthesiol Scand* 2005; **49**: 715–9
- 110 Whittemore AD. Carotid endarterectomy. *Arch Surg* 1980; **115**: 940–2
- 111 Winnie AP, Ramamurthy S, Durrani Z, Radonjic R. Interscalene cervical plexus block: a single-injection technique. *Anesth Analg* 1975; **54**: 370–5
- 112 Yared I, Martinis AJ, Mack RM. Carotid endarterectomy under local anesthesia: a retrospective study. *Am Surg* 1979; **45**: 709–14
